# Supplementary material
Source: PubMed Central journal article supplement (PMC6741501)

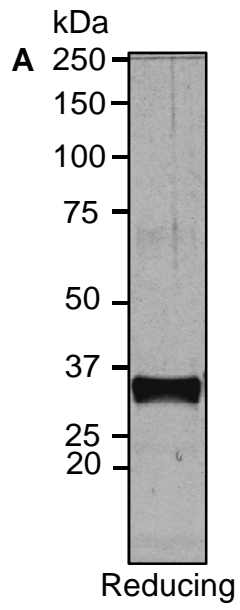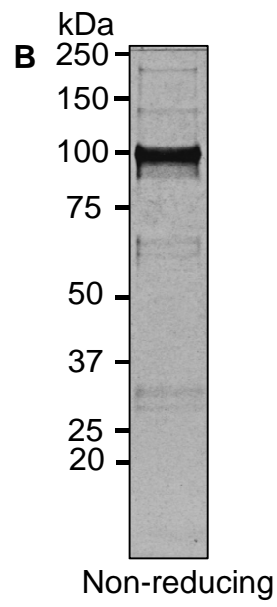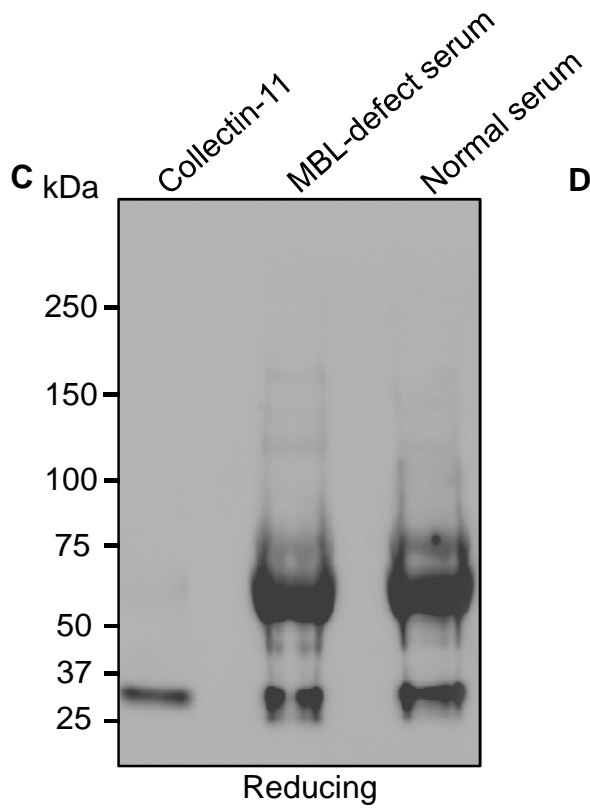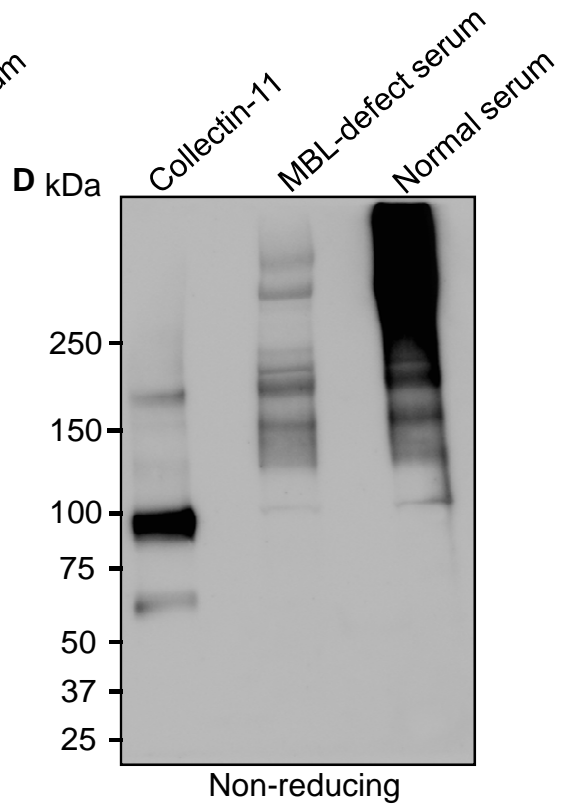

Supplement: jin-0005-0242-s02.pdf [file jin-0005-0242-s02.pdf]

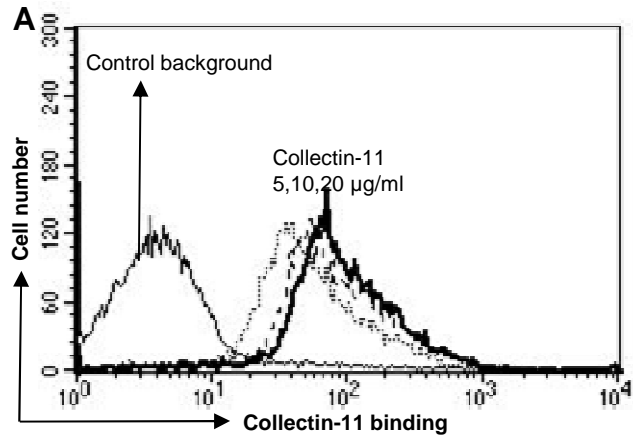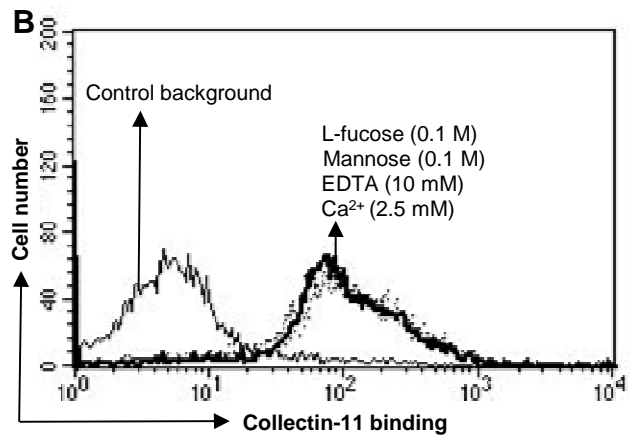

Supplement: jin-0005-0242-s03.pdf [file jin-0005-0242-s03.pdf]
